# Supplementary material
Source: PubMed Central journal article supplement (PMC6726125)

# Supplemental Figure 3

**A**

| Genotype                                                 | Expected (%) | 4 weeks (%)    |
|----------------------------------------------------------|--------------|----------------|
| <i>APP-PS1/Atxn1<sup>+/-</sup> × Atxn1<sup>+/-</sup></i> |              |                |
| <i>APP-PS1/Atxn1<sup>+/+</sup></i>                       | 12.5         | 12.3 (45/365)  |
| <i>APP-PS1/Atxn1<sup>+/-</sup></i>                       | 25.0         | 22.2 (81/365)  |
| <i>APP-PS1/Atxn1<sup>-/-</sup></i>                       | 12.5         | 12.6 (46/365)  |
| <i>Atxn1<sup>+/+</sup></i>                               | 12.5         | 15.1 (55/365)  |
| <i>Atxn1<sup>+/-</sup></i>                               | 25.0         | 27.4 (100/365) |
| <i>Atxn1<sup>-/-</sup></i>                               | 12.5         | 10.4 (38/365)  |
| <i>Atxn1<sup>+/-</sup> × Atxn1<sup>+/-</sup></i>         |              |                |
| <i>Atxn1<sup>+/+</sup></i>                               | 25.0         | 23.4 (38/162)  |
| <i>Atxn1<sup>+/-</sup></i>                               | 50.0         | 55.6 (90/162)  |
| <i>Atxn1<sup>-/-</sup></i>                               | 25.0         | 21.0 (34/162)  |

**B**

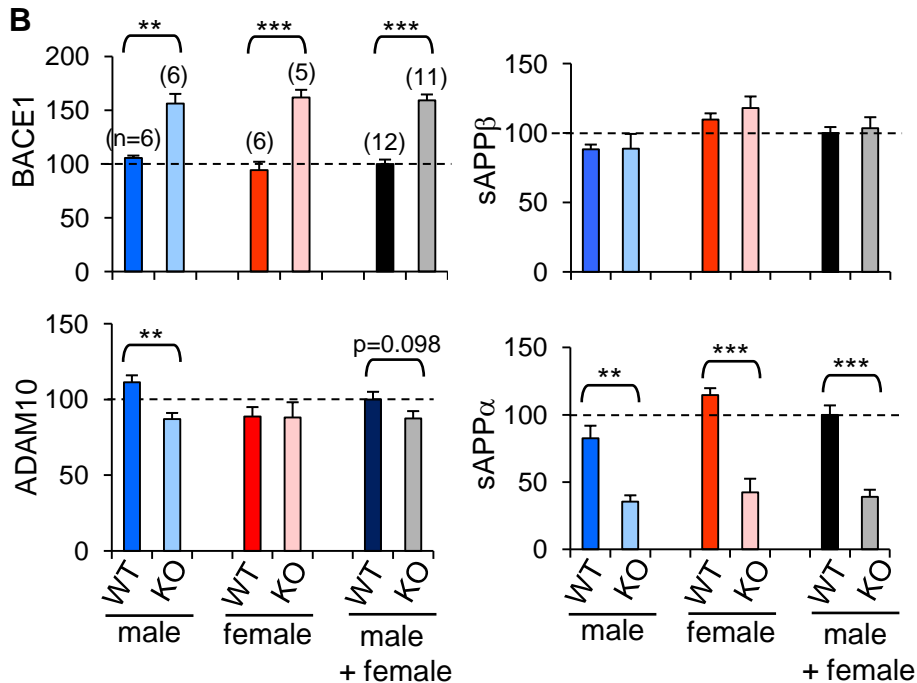

**C**

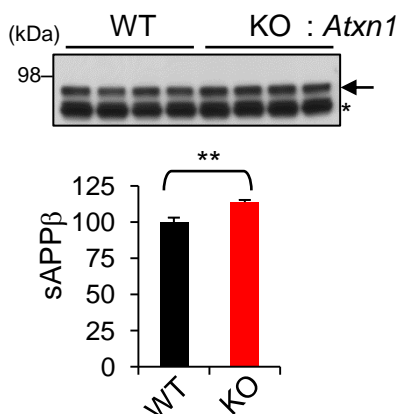

**D**

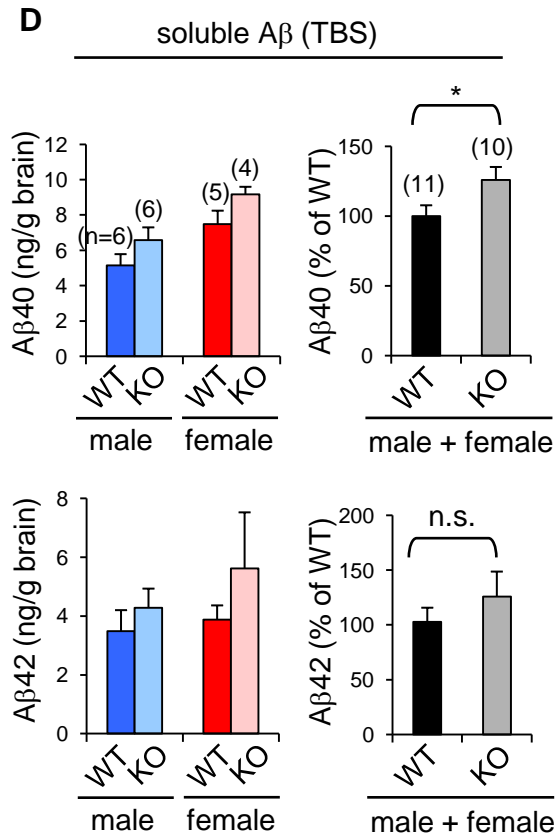

**E**

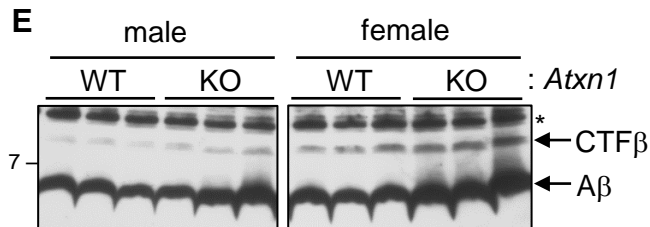

Supplement: NIHMS1536061-supplement-3.pdf [file NIHMS1536061-supplement-3.pdf]
