# Supplementary material
Source: PubMed Central journal article supplement (PMC6726125)

# Supplemental Figure 1

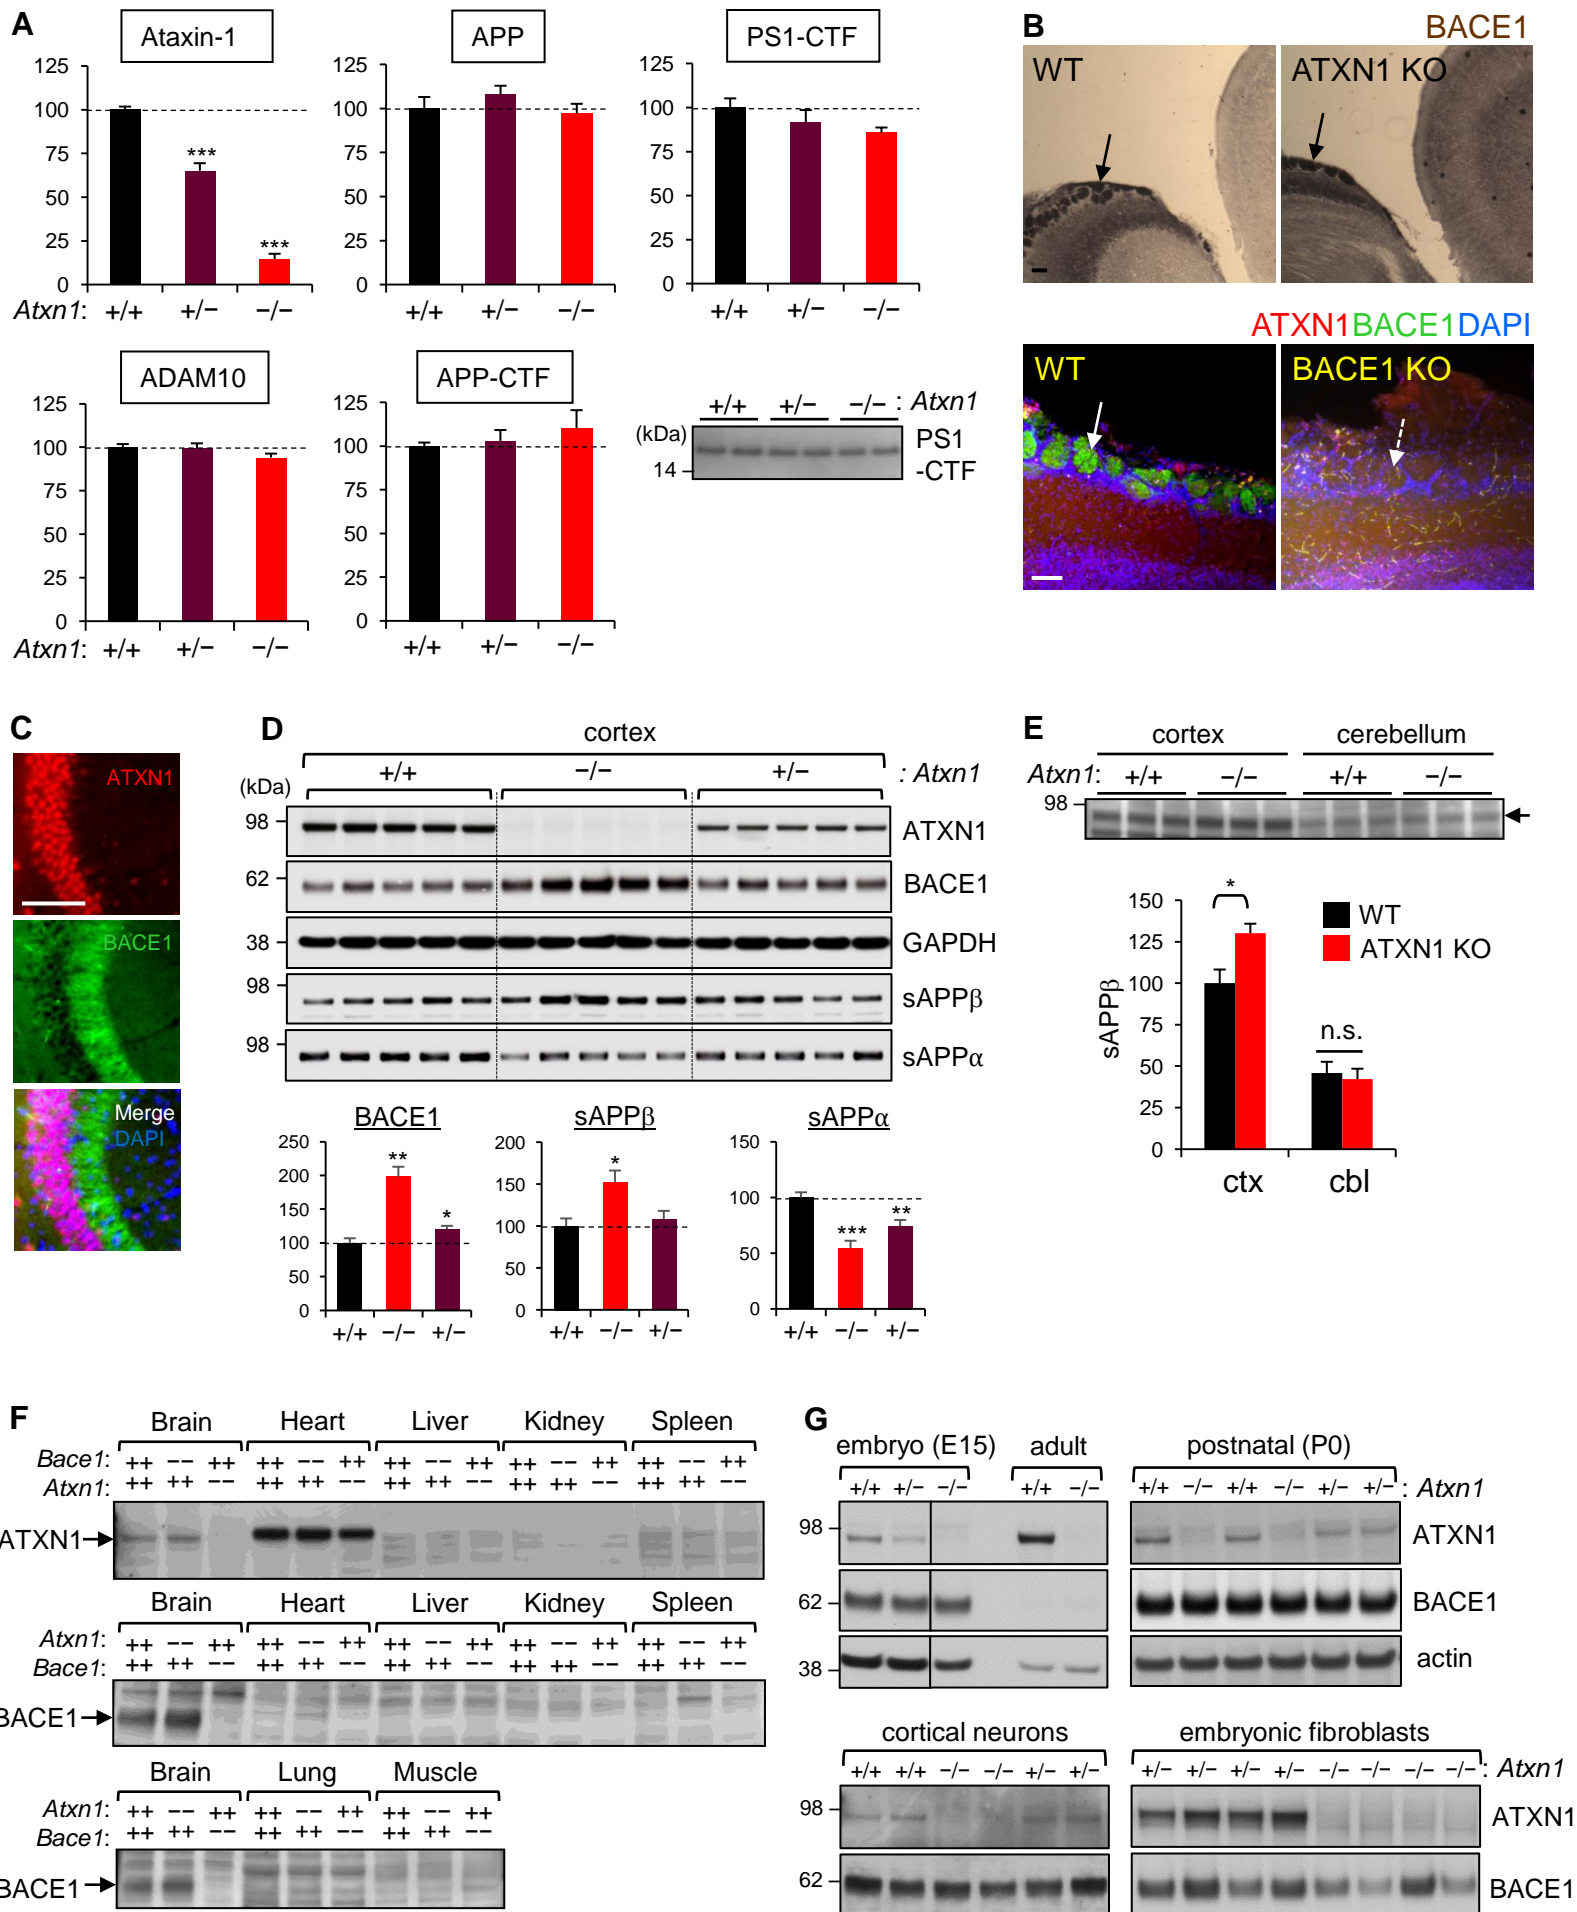

Supplement: NIHMS1536061-supplement-1.pdf [file NIHMS1536061-supplement-1.pdf]

# Supplemental Figure 2

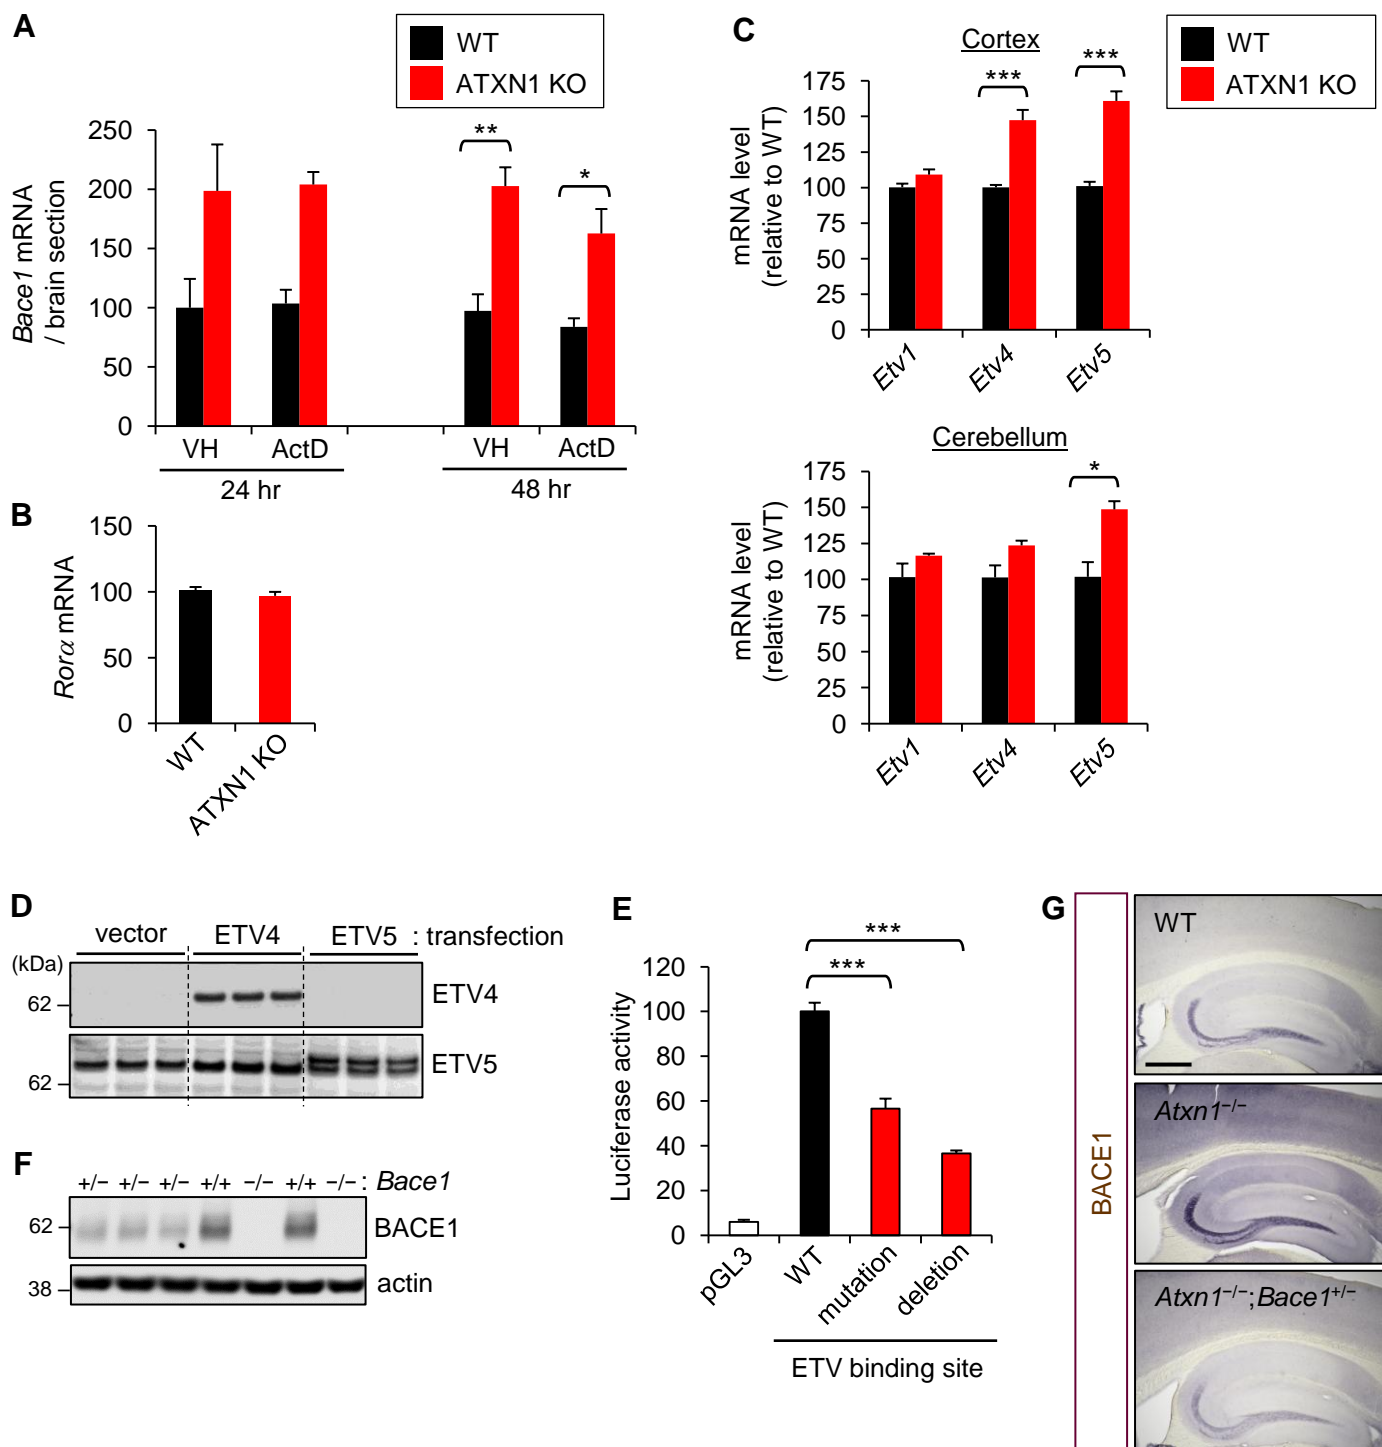

Supplement: NIHMS1536061-supplement-2.pdf [file NIHMS1536061-supplement-2.pdf]

Supplemental Figure 4

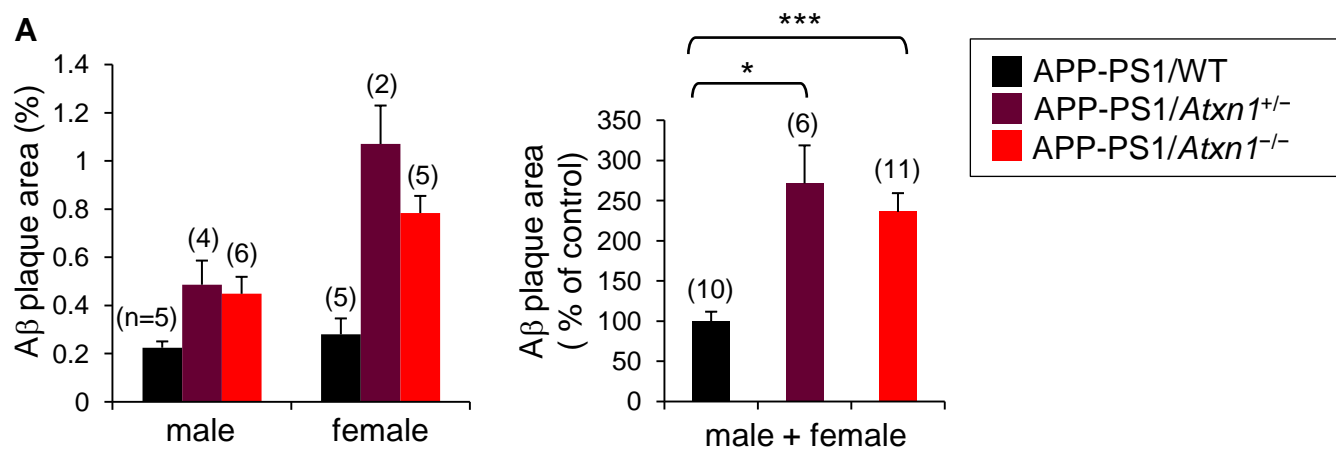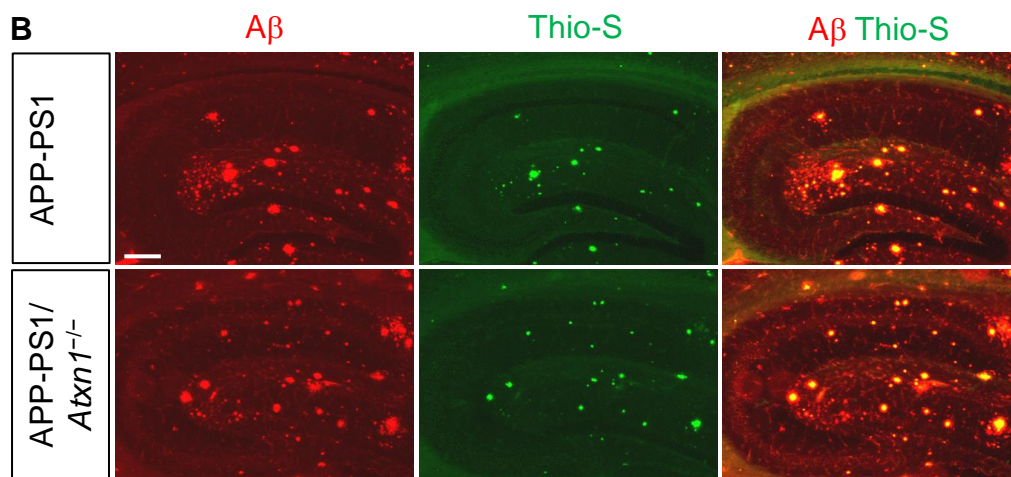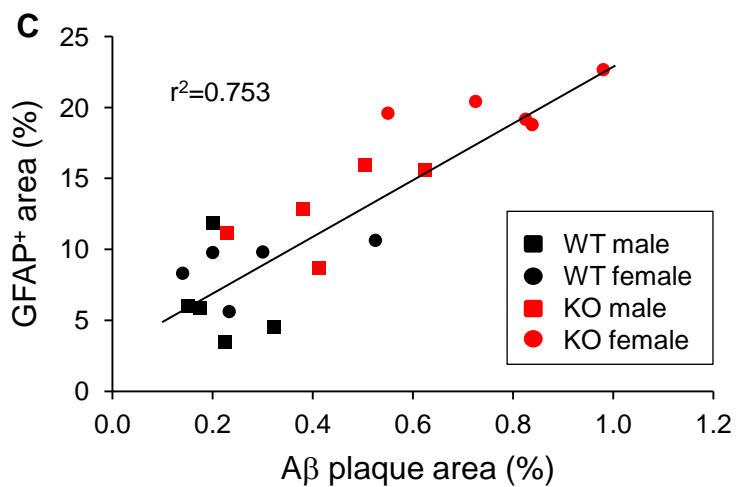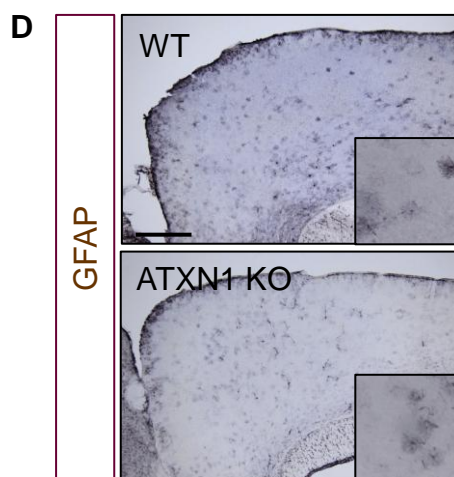

Supplement: NIHMS1536061-supplement-4.pdf [file NIHMS1536061-supplement-4.pdf]

# Supplemental Figure 5

**A**

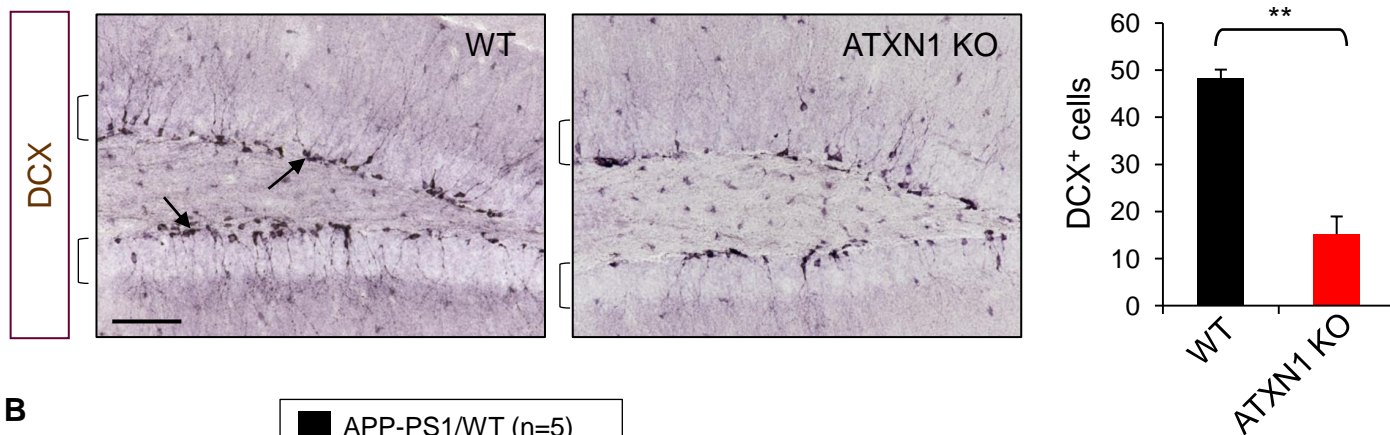

**B**

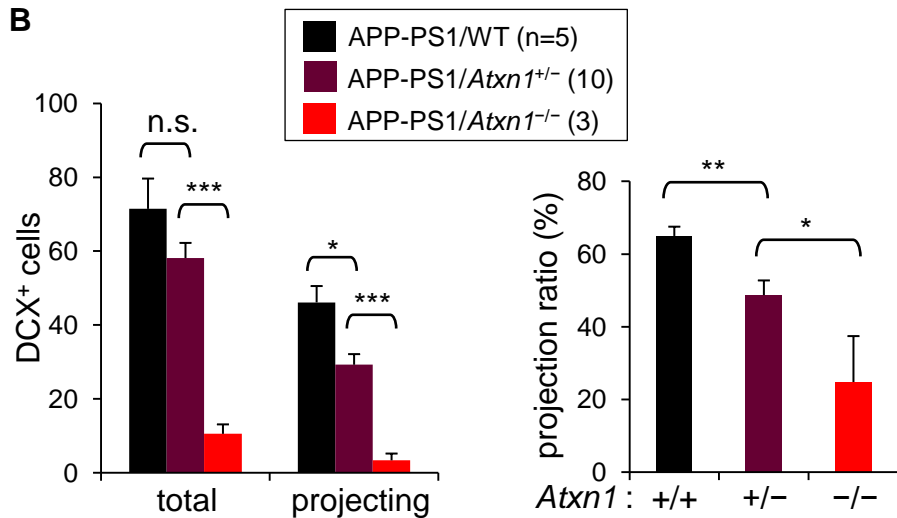

**C**

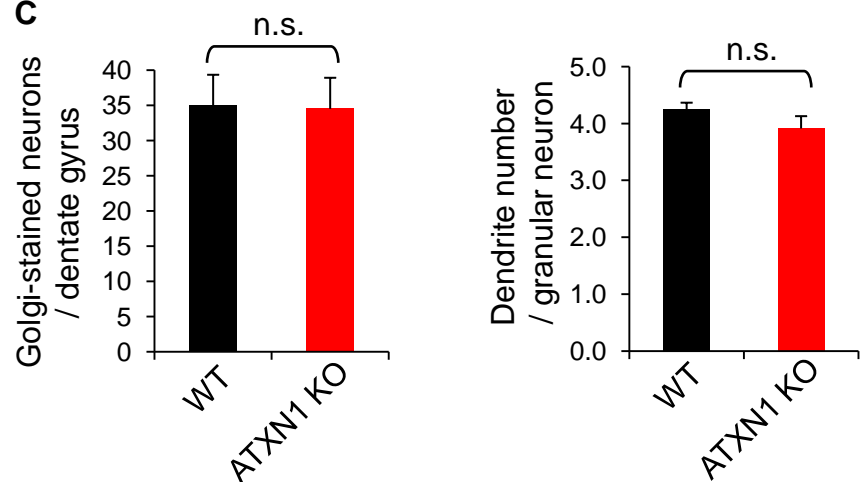

**D**

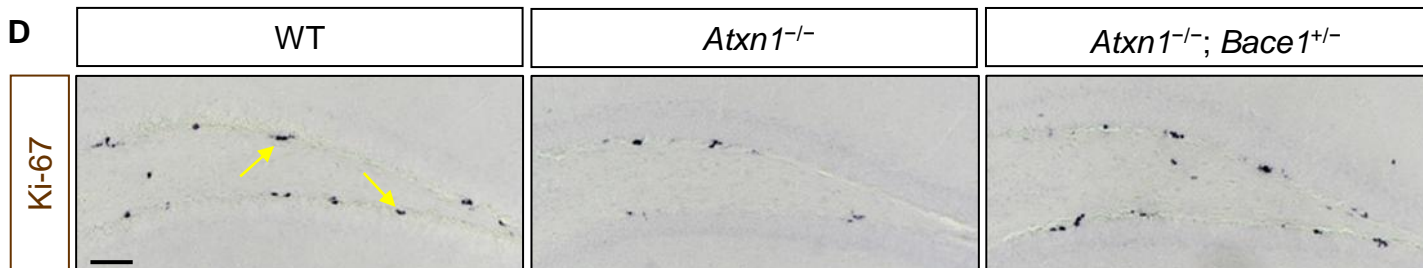

Supplement: NIHMS1536061-supplement-5.pdf [file NIHMS1536061-supplement-5.pdf]

Supplemental Figure 6

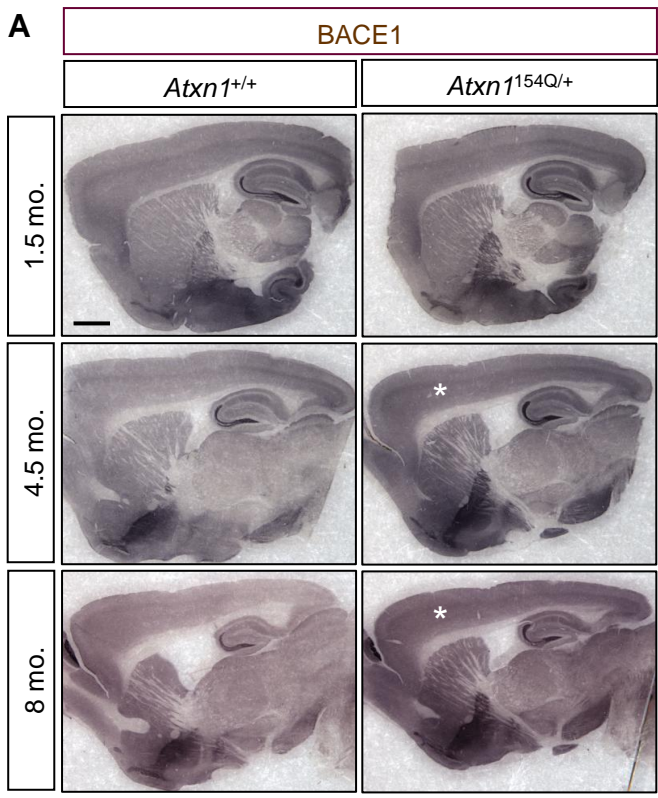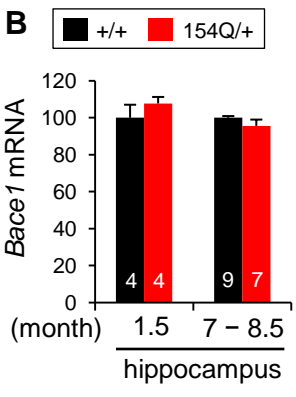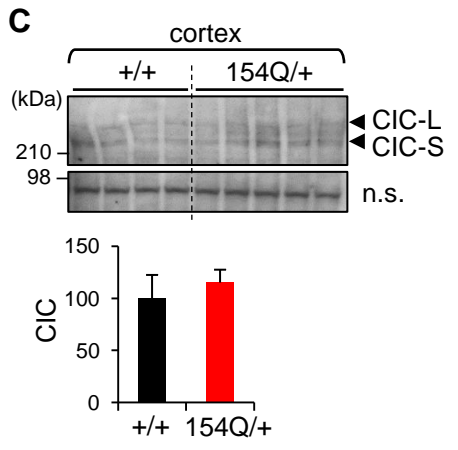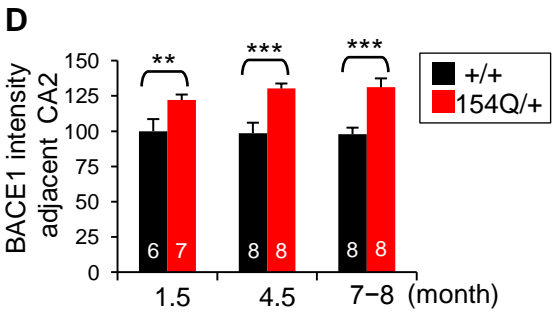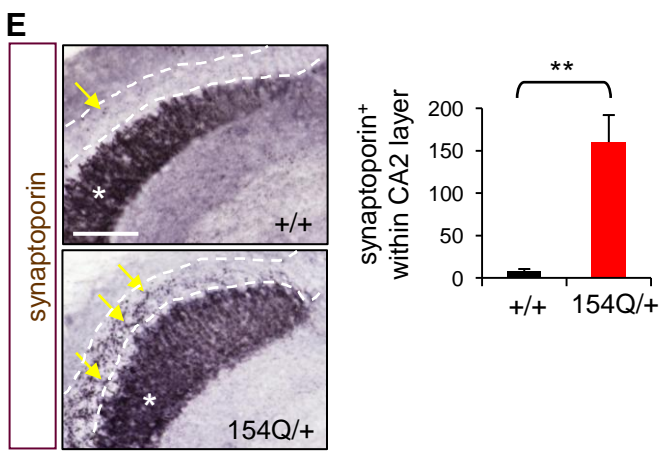

Supplement: NIHMS1536061-supplement-6.pdf [file NIHMS1536061-supplement-6.pdf]

Supplemental Figure 7

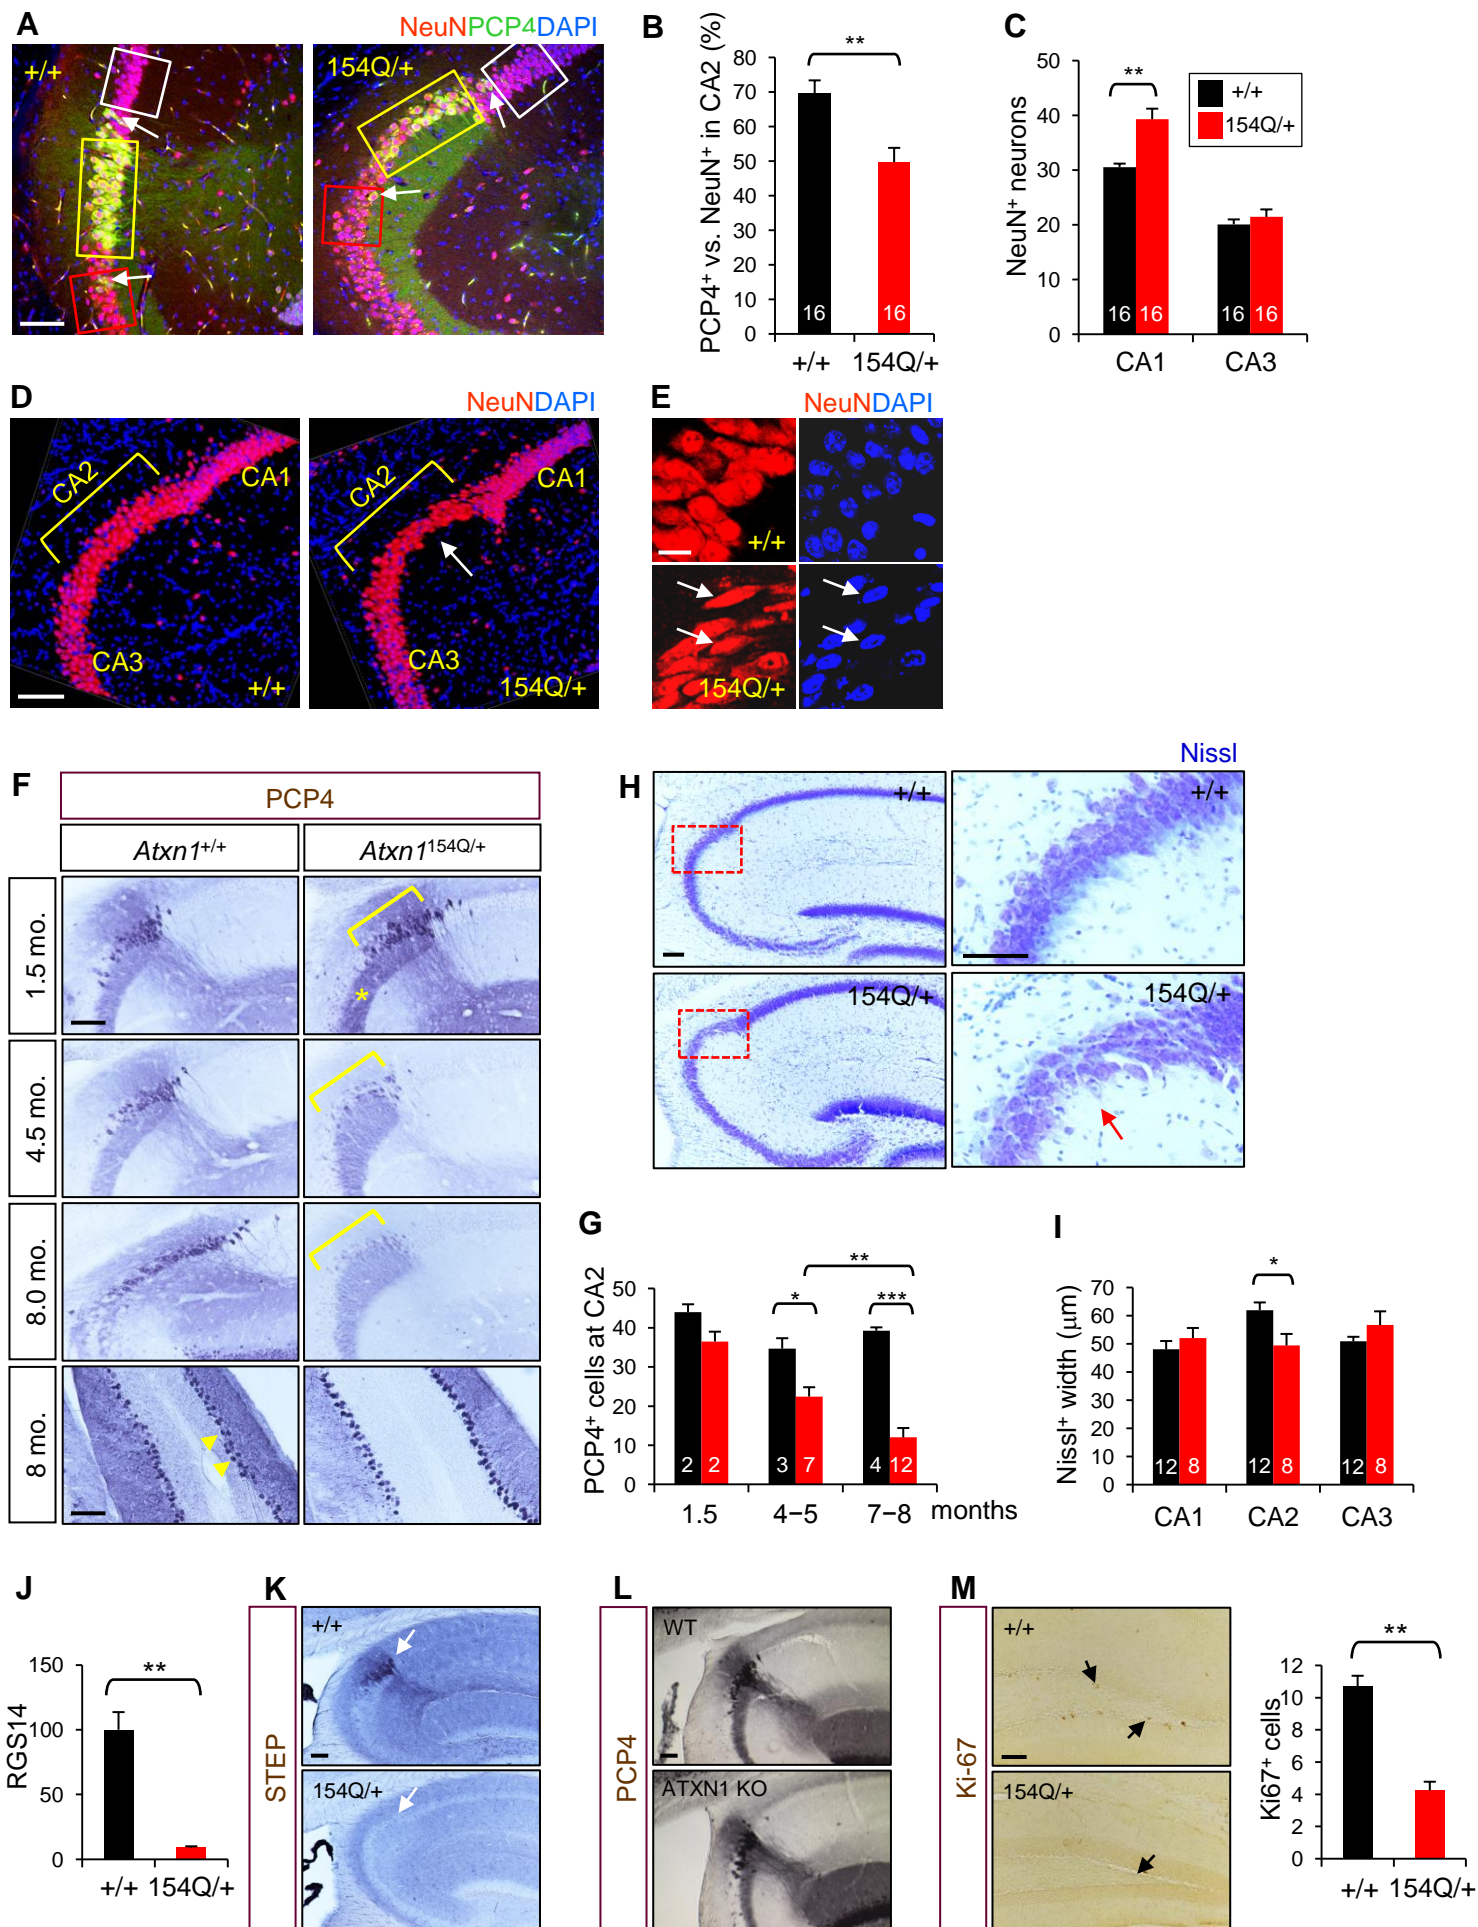

Supplement: NIHMS1536061-supplement-7.pdf [file NIHMS1536061-supplement-7.pdf]
